# Supplementary material for: Correlation of Faecal Egg Counts with Clinical Parameters and Agreement between Different Raters Assessing FAMACHA©, BCS and Dag Score in Austrian Dairy Sheep
Source: MDPI journal article supplement (doi:10.3390/ani13203206), 2023-10-13
Supplement: s1 [file s1]

**Table S1.** Descriptive statistics of egg shedding in terms of eggs per gram of faeces = (EpG) originating from 1195 individual faecal samples from dairy sheep from 16 dairy sheep farms. On average 81 samples were collected per farm (range = 17 to 161 individual faecal samples).

| Farm ID | N Sheep | Minimum EpG | Maximum EpG | Mean EpG | Percentiles |       |        |        |        |
|---------|---------|-------------|-------------|----------|-------------|-------|--------|--------|--------|
|         |         |             |             |          | 10          | 25    | 50     | 75     | 90     |
| 1       | 29      | 0.0         | 885.0       | 185.0    | 0.0         | 42.5  | 100.0  | 147.5  | 600.0  |
| 2       | 22      | 0.0         | 1120.0      | 186.8    | 10.0        | 18.8  | 70.0   | 270.0  | 695.0  |
| 3       | 87      | 30.0        | 12,025.0    | 1134.1   | 72.0        | 155.0 | 365.0  | 1515.0 | 3144.0 |
| 4       | 126     | 0.0         | 2570.0      | 215.4    | 0.0         | 0.0   | 27.5   | 235.0  | 645.5  |
| 5       | 95      | 15.0        | 12,035.0    | 1665.7   | 86.0        | 325.0 | 970.0  | 1875.0 | 4589.0 |
| 6       | 161     | 5.0         | 20,175.0    | 1318.0   | 46.0        | 115.0 | 485.0  | 1500.0 | 3212.0 |
| 7       | 55      | 0.0         | 1815.0      | 433.7    | 21.0        | 75.0  | 170.0  | 585.0  | 1370.0 |
| 8       | 22      | 10.0        | 1580.0      | 254.1    | 31.5        | 58.8  | 147.5  | 325.0  | 546.0  |
| 9       | 17      | 120.0       | 4615.0      | 1470.0   | 172.0       | 442.5 | 1505.0 | 2022.5 | 3151.0 |
| 10      | 118     | 0.0         | 3585.0      | 461.7    | 15.0        | 52.5  | 205.0  | 556.25 | 1129.5 |
| 11      | 119     | 0.0         | 7770.0      | 628.5    | 10.0        | 30.0  | 150.0  | 775.0  | 1910.0 |
| 12      | 128     | 0.0         | 6605.5      | 1065.9   | 20.0        | 106.3 | 480.0  | 1420.0 | 3375.5 |
| 13      | 69      | 0.0         | 5135.0      | 1035.9   | 70.0        | 135.0 | 455.0  | 1595.0 | 2980.0 |
| 14      | 19      | 0.0         | 2085.0      | 314.7    | 20.0        | 25.0  | 145.0  | 450.0  | 710.0  |
| 15      | 42      | 15          | 3100.0      | 352.6    | 23.0        | 50.0  | 177.5  | 376.3  | 1135.0 |
| 16      | 86      | 0.0         | 3150.0      | 397.2    | 15.0        | 33.8  | 152.5  | 507.5  | 1129.0 |
